# Supplementary material for: COL4A1 Mutations Cause Ocular Dysgenesis, Neuronal Localization Defects, and Myopathy in Mice and Walker-Warburg Syndrome in Humans
Source: PLOS journal article supplement (doi:10.1371/journal.pgen.1002062), 2011-05-19
Supplement: S5 (10.1371/journal.pgen.1002062.s005) [file journal.pgen.1002062.s005.pdf › journal.pgen.1002062.s005.pdf]

Table 1: Sequencing Primers

| Primer Name     | Primer Sequence                | Primer Length |
|-----------------|--------------------------------|---------------|
| COL4A1_x_30_F   | GCTTGAAAAGGGTTGAGCAG           | 20            |
| COL4A1_x_30_R   | GCCTCTAAGATTTGCATCGTTC         | 22            |
| COL4A1_x_31_F   | CCTAGAGCTCGTGGCTTCC            | 20            |
| COL4A1_x_31_R   | CTTCACTTTATAGGGACCCCG          | 21            |
| COL4A1-1F_3     | ATTGGCCCTTCCAGAAGCA            | 19            |
| COL4A1-1R_3     | CCAGTACCCATACCATAACAAAGGAG     | 26            |
| COL4A1_x11_F    | CACCTGCTAGGAGTGGGAG            | 20            |
| COL4A1_x11_R    | TTGACTAAGGGATGGATGAAAG         | 22            |
| COL4A1_x12_F    | GCCTGAAATCTACCATCTTATTGC       | 24            |
| COL4A1_x12_R    | AGTCCAGACATTGATCCAAAGG         | 22            |
| COL4A1_x13_F    | TTTAGGCTTTTACCTCTCTCTGC        | 23            |
| COL4A1_x13_R    | CTGAGTTTGTACCCATTTTCTC         | 22            |
| COL4A1_x14-15_F | CAAGTGAGTGCTGGAGATCAAC         | 22            |
| COL4A1_x14-15_R | AGAAGTCCCTACGAGCCTTTTC         | 22            |
| COL4A1_x16_F    | GAGAAGCAGTAACCGTCAGAGG         | 22            |
| COL4A1_x16_R    | CAGAGCTTGGTGTTATATCCGTTA       | 25            |
| COL4A1_x17_F    | CACATAGGAACAAGGCGAACTC         | 22            |
| COL4A1_x17_R    | TGGTTTTTACAAGCAGGCTCAC         | 22            |
| COL4A1_x18_F    | GGCACACTCTATTTTACCAGAAG        | 23            |
| COL4A1_x18_R    | CAGTGCTCTCACAGACCCAG           | 20            |
| COL4A1-19F_3    | CCTGACCTTGTGATCCACCT           | 20            |
| COL4A1-19R_3    | AGACCTGGTCACAGACAGTCTT         | 22            |
| COL4A1_x2_F     | CATCTCCATTGTCATAGTGCC          | 21            |
| COL4A1_x2_R     | CACCTGAATTGCTGATTATTCG         | 22            |
| COL4A1_x20_F    | ACACTTACCAATGCACCAAGC          | 21            |
| COL4A1_x20_R    | CGTAAGATTGCTACCGATTGTG         | 22            |
| COL4A1_x21_F    | CTTTTCAGTGATGGTCTGGTTG         | 22            |
| COL4A1_x21_R    | CGCCTTCTATTACACTCTGGC          | 22            |
| COL4A1_x22_F    | TGGTTTTATAATAGAGGTTGAGTTAGGAG  | 29            |
| COL4A1_x22_R    | GCTCCAAAGCCGGTAAGTATG          | 21            |
| COL4A1_x23_F    | AATATGTTAGTGACAGCCTTGCC        | 23            |
| COL4A1_x23_R    | GAAAATCAGGCCTTCTATGGAG         | 22            |
| COL4A1_x24_F    | TATCCAAGCAATCATCCACTTC         | 22            |
| COL4A1_x24_R    | AATGCAAAACGACACAACCTCTG        | 22            |
| COL4A1_x25_F    | AGGTGGCTTCTTGATTCTATGG         | 22            |
| COL4A1_x25_R    | GCCATCATCAAGGAGATAGAAATAC      | 25            |
| COL4A1_x26_F    | CAGAAGAATGCGATAAGGACAG         | 22            |
| COL4A1_x26_R    | CCAATTCTCGGAAGAATCAAAG         | 22            |
| COL4A1_x27-28_F | AGGGAAGAAGTGGAGAACACAG         | 22            |
| COL4A1_x27-28_R | CAGCTTCTGTGGTGTTTTGATG         | 22            |
| COL4A1_x29_F    | CCTCCACAGTTGACCTTCTCAG         | 22            |
| COL4A1_x29_R    | GCTACGTTCTCTGATACTTTCTATTCTATG | 30            |
| COL4A1_x32-33_F | TCTGCAGAAAGTCATAGTTAAACAG      | 25            |
| COL4A1_x32-33_R | TGATCTATGACAACTTGAGAAATTC      | 26            |
| COL4A1_x3-4_F   | TATAGCCATCACAGTTGGTCAC         | 22            |
| COL4A1_x3-4_R   | AGGAGAAAGGAGGGAAGG             | 20            |
| COL4A1_x34-35_F | ACAAGAACGTGAGCCTTTTGAG         | 22            |
| COL4A1_x34-35_R | TCTACAGAAAGAGCTGGGGAAC         | 22            |
| COL4A1_x36_F    | AGCCAGGTACAGTGTGGAGC           | 20            |
| COL4A1_x36_R    | CCTGGATTCTGTCCGTCTCAG          | 21            |
| COL4A1_x37_F    | CTTGATATCTCATTTCTGGCTGG        | 22            |
| COL4A1_x37_R    | GACTCCCTGTGTGTTATGGCTC         | 22            |
| COL4A1-38F2     | CCTCTACctgtcttctcctttga        | 22            |
| COL4A1-38R2     | GAAACCAGATGGTTGGCTCTAC         | 22            |
| COL4A1-39F_3    | TGCAGGGAGATCAAGGGATA           | 20            |
| COL4A1-39R_3    | TCCTGCTAGTGACAAGACCTCA         | 22            |
| COL4A1_x40_F    | CAAAGGGCCATTTTGTATGG           | 20            |
| COL4A1_x40_R    | TTATTCACTGAACACAGGCAGTC        | 23            |
| COL4A1_x41_F    | TAGTGCTTTGTGTTGTACCTGC         | 22            |
| COL4A1_x41_R    | GAAGACACTGCCCTTTGTTC           | 20            |
| COL4A1_x42_F    | GTTTCTGTGGTGTCCCTGG            | 20            |
| COL4A1_x42_R    | GCCAAACACAATTCAAGCTG           | 21            |
| COL4A1_x43_F    | TCTGTCTCAAGGGTTGTCACTG         | 22            |
| COL4A1_x43_R    | AAGAAAGAACTGATTTAGTGGGG        | 23            |
| COL4A1_x44_F    | TTCCAACTAGCAGGTTACTGGAG        | 23            |
| COL4A1_x44_R    | GGTGCTATCAGTGCTAAGGTGC         | 22            |
| COL4A1_x45_F    | GCAGGTGATGAATGTGTATATATGG      | 26            |
| COL4A1_x45_R    | TTGCTGCAAGAATTCCTATC           | 22            |
| COL4A1_x46_F    | TTCTCCTTCTAAAGTTGTTTCCG        | 23            |
| COL4A1_x46_R    | AGATACATGGGTGAGGAGAAC          | 22            |
| COL4A1_x47_F    | GCTCCTTGAACACTGAAAAGG          | 21            |
| COL4A1_x47_R    | ATGCCTGGTTCTGCTCCTTC           | 20            |
| COL4A1_x48_F    | CATGAATAGGTAGGATACCTTTGTGG     | 25            |
| COL4A1_x48_R    | AGTGTTTCACTCGCTACTGCC          | 21            |
| COL4A1_x49_F    | TGTCCAGCTGAAATCCACTTTAC        | 23            |
| COL4A1_x49_R    | AATGGATTCAACGTTTGGAG           | 21            |
| COL4A1_x50_F    | ATGTTGAGTGTAGGTAACGGGG         | 22            |
| COL4A1_x50_R    | CGAGATGCGAGAGAACTCCAAG         | 21            |
| COL4A1_x51_F    | AGTGTGTGGCTTTCCAGAGG           | 20            |
| COL4A1_x51_R    | CATCTTTGAGACTTTGCATTGG         | 22            |
| COL4A1_x52_F    | GGCTGATCCCTTAGAGATTTC          | 22            |
| COL4A1_x52_R    | ATTGACAGTGAGGTACACAGG          | 22            |
| COL4A1_x5-6_F   | ATGAGGGCATGACTCCATTAAAC        | 22            |
| COL4A1_x5-6_R   | TTTCCAATTGTGGCAAATAAAAC        | 23            |
| COL4A1_x7-8_F   | AGTGATGCATGCGATGTCAG           | 20            |
| COL4A1_x7-8_R   | GAATGTGCTTCTATGGCACTTG         | 22            |
| COL4A1_x9-10_F  | TGCCAACTATCAAGAGTTTTCAG        | 24            |
| COL4A1_x9-10_R  | GAGCGACCACAACCTGTGTAAAG        | 22            |
