# Supplementary material for: COL4A1 Mutations Cause Ocular Dysgenesis, Neuronal Localization Defects, and Myopathy in Mice and Walker-Warburg Syndrome in Humans
Source: PLOS journal article supplement (doi:10.1371/journal.pgen.1002062), 2011-05-19
Supplement: S6 (10.1371/journal.pgen.1002062.s006) [file journal.pgen.1002062.s006.pdf › journal.pgen.1002062.s006.pdf]

**Table 2: Non-Synonymous Coding Variants**

| <b>Amino Acid</b> | <b>Codon</b>                | <b>Position</b>       | <b>Genotype (number of patients)</b> |
|-------------------|-----------------------------|-----------------------|--------------------------------------|
| Val 7 Leu         | <u>G</u> TC --> <u>C</u> TC | within signal peptide | G/G (10) C/G (11) C/C (5)            |
| Met 1016 Val      | <u>A</u> TG --> <u>G</u> TG | Y position of repeat  | A/A (26) A/G (1) G/G (0)             |
| Gln 1316 Glu      | <u>C</u> AA --> <u>G</u> AA | Y position of repeat  | C/C (26) C/G (1) G/G (0)             |
| Gln 1334 His      | <u>C</u> AA --> <u>C</u> AC | Y position of repeat  | A/A (11) A/C (13) G/G (3)            |
