# Supplementary material for: COL4A1 Mutations Cause Ocular Dysgenesis, Neuronal Localization Defects, and Myopathy in Mice and Walker-Warburg Syndrome in Humans
Source: PLOS journal article supplement (doi:10.1371/journal.pgen.1002062), 2011-05-19
Supplement: S7 (10.1371/journal.pgen.1002062.s007) [file journal.pgen.1002062.s007.pdf › journal.pgen.1002062.s007.pdf]

**Table 3: Synonymous Coding Variants**

| <b>Amino Acid</b> |      |     | <b>Codon</b> | <b>Genotype (number of patients)</b> |          |         |  |
|-------------------|------|-----|--------------|--------------------------------------|----------|---------|--|
| Ala               | 144  | Ala | GCA --> GCT  | A/A (10)                             | A/T (10) | T/T (7) |  |
| Pro               | 419  | Pro | CCT --> CCC  | T/T (16)                             | T/C (9)  | C/C (2) |  |
| Pro               | 605  | Pro | CCT --> CCC  | T/T (26)                             | T/C (1)  | C/C (0) |  |
| Pro               | 710  | Pro | CCG --> CCA  | G/G (14)                             | G/A (13) | A/A (0) |  |
| Glu               | 733  | Glu | GAG --> GAA  | G/G (26)                             | G/A (1)  | A/A (0) |  |
| Gly               | 1061 | Gly | GGG --> GGA  | G/G (13)                             | G/A (14) | A/A (0) |  |
| Arg               | 1063 | Arg | CGA --> CGT  | A/A (13)                             | A/T (14) | T/T (0) |  |
| Leu               | 1324 | Leu | CTC --> CTT  | C/C (26)                             | C/T (1)  | T/T (0) |  |
| Gly               | 1332 | Gly | GGC --> GGT  | C/C (26)                             | C/T (1)  | T/T (0) |  |
| Ala               | 1490 | Ala | GCC --> GCT  | C/C (17)                             | C/T (7)  | T/T (3) |  |
| Ala               | 1599 | Ala | GCG --> GCA  | G/G (26)                             | G/A (1)  | A/A (0) |  |
| Ser               | 1600 | Ser | TCC --> TCT  | C/C (17)                             | C/T (8)  | T/T (2) |  |
