# Supplementary material for: COL4A1 Mutations Cause Ocular Dysgenesis, Neuronal Localization Defects, and Myopathy in Mice and Walker-Warburg Syndrome in Humans
Source: PLOS journal article supplement (doi:10.1371/journal.pgen.1002062), 2011-05-19
Supplement: S8 (10.1371/journal.pgen.1002062.s008) [file journal.pgen.1002062.s008.pdf › journal.pgen.1002062.s008.pdf]

**Table 4: Intronic Variants**

| Intronic Position |              | Genotype (number of patients) |            |           |         |
|-------------------|--------------|-------------------------------|------------|-----------|---------|
| -6                | from exon 1  | G/G (12)                      | G/T (11)   | T/T (2)   | G/A (1) |
| -11               | from exon 2  | T/T (18)                      | T/C (7)    | C/C (2)   |         |
| +8                | from exon 3  | C/C (23)                      | C/T (1)    | T/T (3)   |         |
| +64               | from exon 4  | G/G (22)                      | G/A (2)    | A/A (3)   |         |
| +15               | from exon 8  | delATTTT (2)                  |            |           |         |
| +24               | from exon 10 | C/C (18)                      | C/T (7)    | T/T (2)   |         |
| +59               | from exon 10 | T/T (14)                      | T/G (11)   | G/G (2)   |         |
| -11               | from exon 11 | C/C (21)                      | C/G (5)    | G/G (1)   |         |
| +88               | from exon 11 | C/C (15)                      | C/T (10)   | T/T (2)   |         |
| +68               | from exon 11 | AC/AC (15)                    | AC/GT (10) | GT/GT (2) |         |
| +7                | from exon 13 | A/A (14)                      | A/G (11)   | G/G (2)   |         |
| -7                | from exon 15 | C/C (15)                      | C/G (11)   | G/G (1)   |         |
| -10               | from exon 16 | C/C (13)                      | C/T (12)   | T/T (2)   |         |
| +18               | from exon 16 | A/A (12)                      | A/G (13)   | G/G (2)   |         |
| -36               | from exon 21 | C/C (6)                       | C/G (16)   | G/G (5)   |         |
| +44               | from exon 21 | G/G (24)                      | G/A (3)    | A/A (0)   |         |
| +58               | from exon 23 | T/T (25)                      | T/C (2)    | C/C (0)   |         |
| +29               | from exon 26 | A/A (13)                      | A/G (14)   | G/G (0)   |         |
| +86               | from exon 26 | C/C (7)                       | C/T (18)   | T/T (2)   |         |
| -16               | from exon 28 | G/G (23)                      | G/A (4)    | A/A (0)   |         |
| +75               | from exon 29 | G/G (14)                      | G/A (13)   | A/A (0)   |         |
| -69               | from exon 30 | C/C (23)                      | C/T (4)    | T/T (0)   |         |
| +51               | from exon 35 | C/C (12)                      | C/T (12)   | T/T (1)   |         |
| -62               | from exon 36 | C/C (13)                      | C/T (13)   | T/T (1)   |         |
| -31               | from exon 36 | A/A (13)                      | A/G (13)   | G/G (1)   |         |
| +102              | from exon 43 | A/A (26)                      | A/G (1)    | G/G (0)   |         |
| -9                | from exon 44 | T/T (11)                      | T/C (14)   | C/C (2)   |         |
| +45               | from exon 44 | T/T (11)                      | T/C (14)   | C/C (2)   |         |
| +48               | from exon 44 | C/C (11)                      | C/T (13)   | T/T (3)   |         |
| -78               | from exon 45 | A/A (26)                      | A/G (1)    | G/G (0)   |         |
| +38               | from exon 46 | C/C (10)                      | C/G (12)   | G/G (5)   |         |
| +7                | from exon 49 | C/C (20)                      | C/T (7)    | T/T (0)   |         |
| +8                | from exon 49 | G/G (26)                      | G/A (1)    | A/A (0)   |         |
| +16               | from exon 49 | G/G (20)                      | G/A (7)    | A/A (0)   |         |
| -32               | from exon 50 | G/G (25)                      | G/A (2)    | A/A (0)   |         |
